# Supplementary material for: Proof-of-concept: Interfacing the liquid sampling-atmospheric pressure glow discharge ion source with a miniature quadrupole mass spectrometer towards trace metal analysis in cell culture media
Source: Royal Society of Chemistry journal article supplement (doi:10.1039/c8ja00278a), 2018-01-01
Supplement: c8ja00278a1.pdf [file c8ja00278a1.pdf]

Supplementary Information

Proof-of-Concept: Interfacing the Liquid Sampling-Atmospheric Pressure Glow  
Discharge Ion Source with a Miniature Quadrupole Mass Spectrometer Towards Trace

Metal Analysis in Cell Culture Media

Edward D. Hoegg, Bhumit A. Patel, William N. Napoli, Douglas D. Richardson, R  
Kenneth Marcus\*

SI Fig. 1a

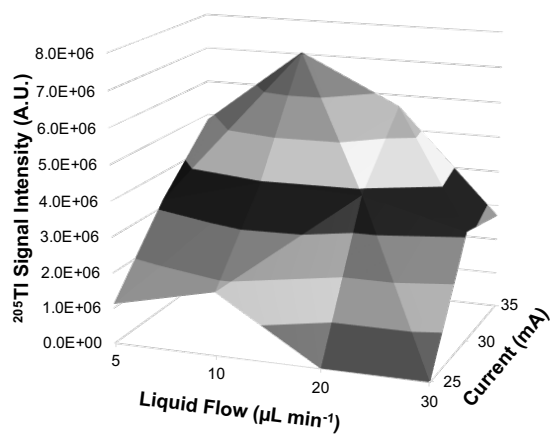

SI Fig. 1b

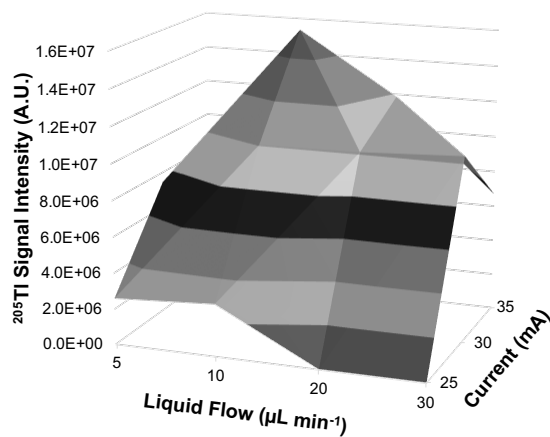

SI Fig. 1c

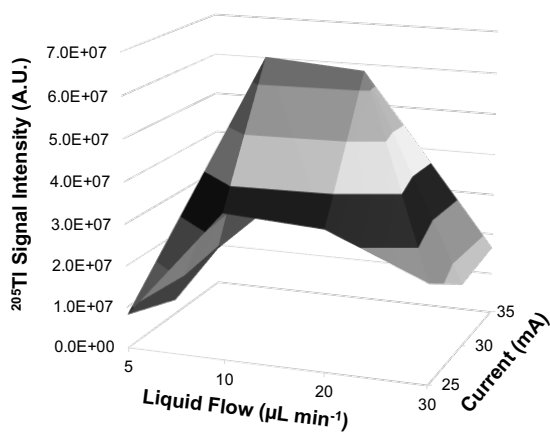

Supplementary Figure 1. Parametric evaluation of  $^{205}\text{Tl}$  ion signal response ( $25 \mu\text{g mL}^{-1}$  in 2%  $\text{HNO}_3$ ) as a function of discharge current and liquid flow rate at gas flow rates of a)  $0.250 \text{ L min}^{-1}$  b)  $0.375 \text{ L min}^{-1}$  c)  $0.500 \text{ L min}^{-1}$

SI Fig. 2

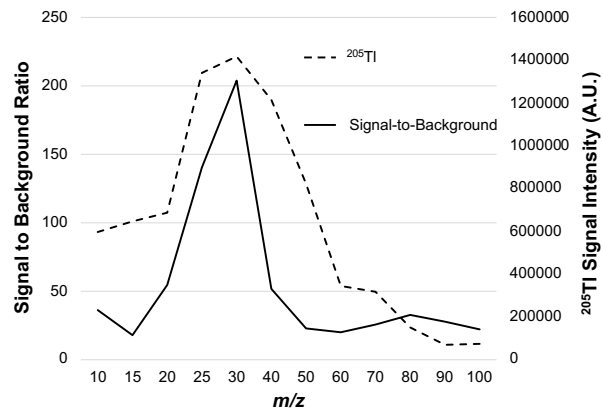

Supplementary Figure 2. Evaluation of  $^{205}\text{Tl}$  signal-to-background ratio as a function of the in-source CID potential. LS-APGD operating parameters were: current = 30 mA, gas flow rate = 0.5 L  $\text{min}^{-1}$ , and liquid flow rate of 10  $\mu\text{L min}^{-1}$ .

Supplementary Table 1. Components of the LS-APGD ionization source and their manufacturers.

| <b>Component</b>         | <b>Product</b>                                         | <b>Manufacturer</b>                           |
|--------------------------|--------------------------------------------------------|-----------------------------------------------|
| Counter electrode        | SS, weldable feedthrough                               | MDC Vacuum Products, LLC                      |
| Solution inner capillary | Silica, 280 $\mu\text{m}$ i.d., 580 $\mu\text{m}$ o.d. | Restek Corporation                            |
| Outer capillary          | 316 SS, 0.8 mm i.d., 1.6 mm o.d.                       | New England Small Tube Corp.                  |
| Power supply             | SL60                                                   | Spellman High Voltage Electronics Corporation |
| Syringe pump             | NE-1000                                                | New Era Pump Systems, Inc.                    |
